# Supplementary material for: The Heavy-Metal Fingerprint of the Irinovskoe Hydrothermal Sulfide Field, 13°20′ N, Mid-Atlantic Ridge
Source: MDPI journal article supplement (doi:10.3390/min12121626), 2022-12-16
Supplement: s1 [file s1]

## Supplementary Material S1 (SM1)

### Morphology of minerals from Zn-rich chimneys of the Irinovskoe hydrothermal field, BSE images

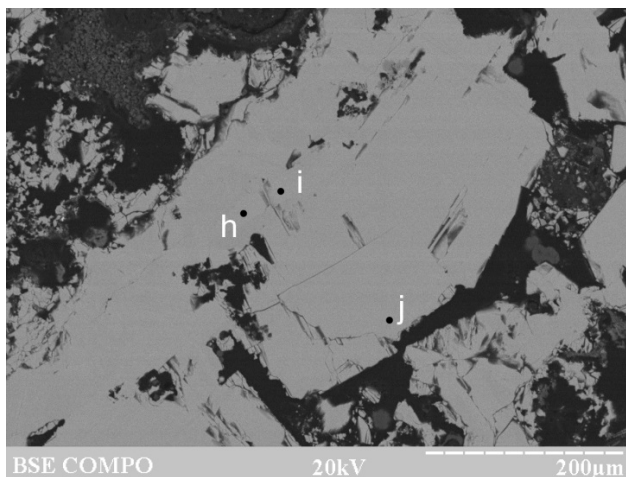

**Figure S1-1.** High-Fe low-Cd ZnS crystals (most likely, wurtzite) (h, j, i); sample 241-2/3-2, Image (hereinafter I) #35547.

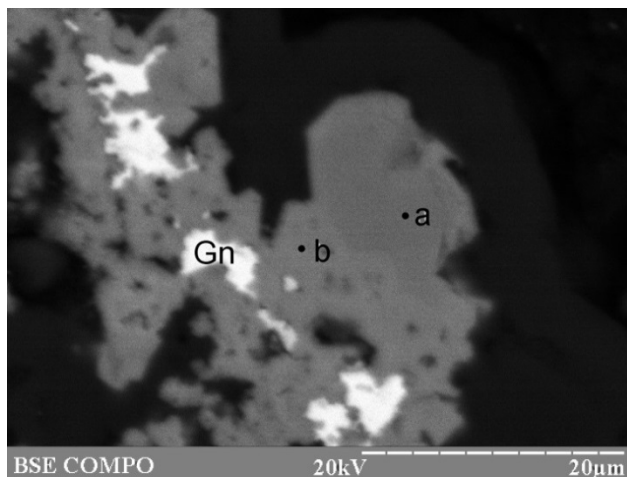

**Figure S1-2.** Interstitial galena (Gn) in crystalline Cd-poor Zn sulfide (a) replaced by Cd-rich Zn sulfide (b) from the rims; sample 241-2/1-11, I #34917.

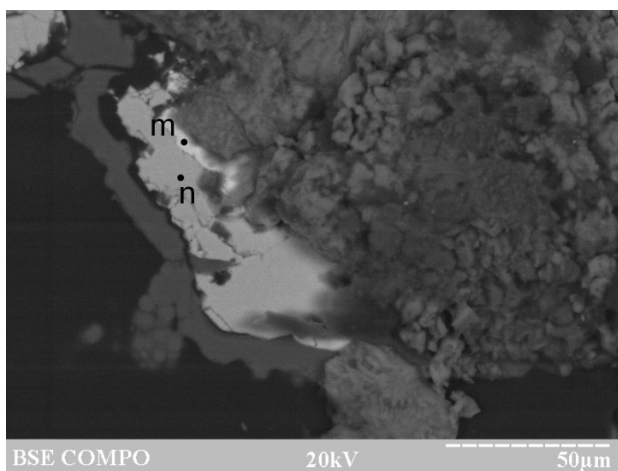

**Figure S1-3.** Rims of opal and Zn-bearing CdS phase (m) around Cd-free Zn sulfide (n); sample 241, I #35721.

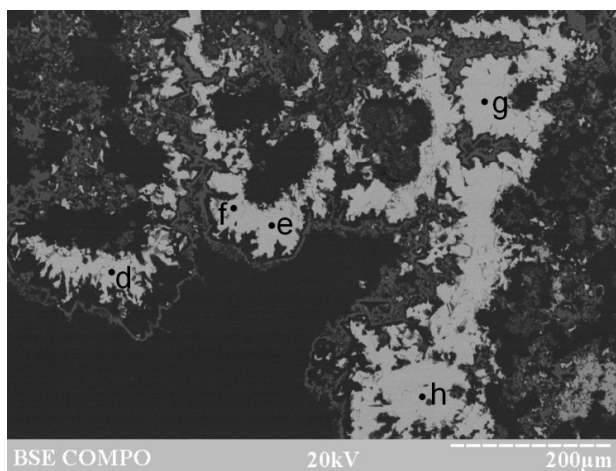

**Figure S1-4.** High-Fe low-Cd crystalline sphalerite (d, e, g, h) intergrown with chalcopyrite (f); sample 241-2/1-11, I #34922.

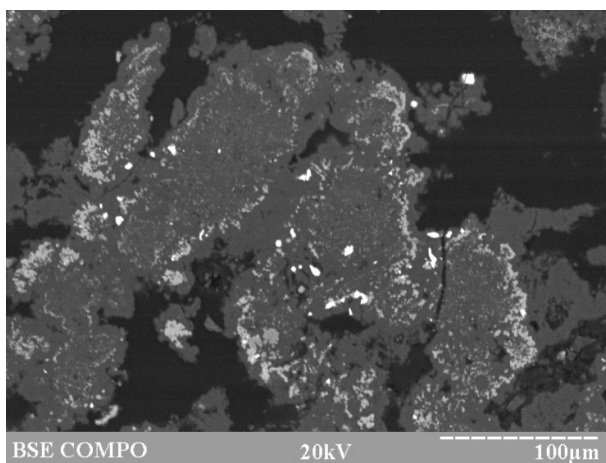

**Figure S1-5.** Zoned dendritic galena-sphalerite-opal aggregates; sample 241-2/1-11, I #34923.

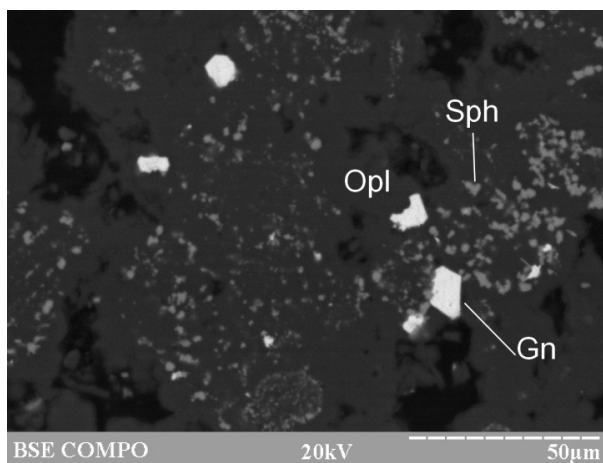

**Figure S1-6.** Inclusions of galena crystals and sphalerite grains (Sph) in opal (Opl); sample 241-2/1-11, I #34928.

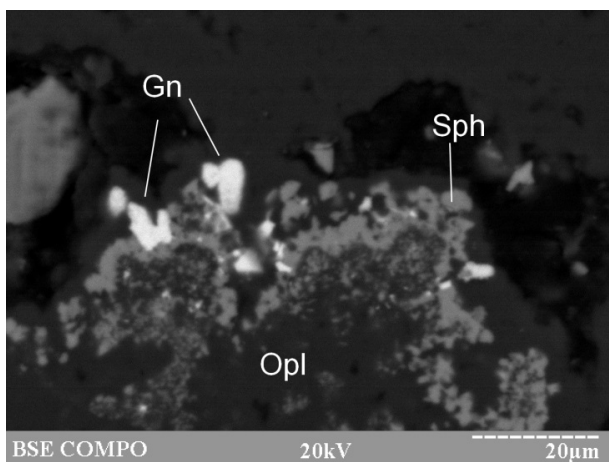

**Figure S1-7.** Opal rimmed by sphalerite with galena crystals on top; sample 241-2/1-11, I #34924.

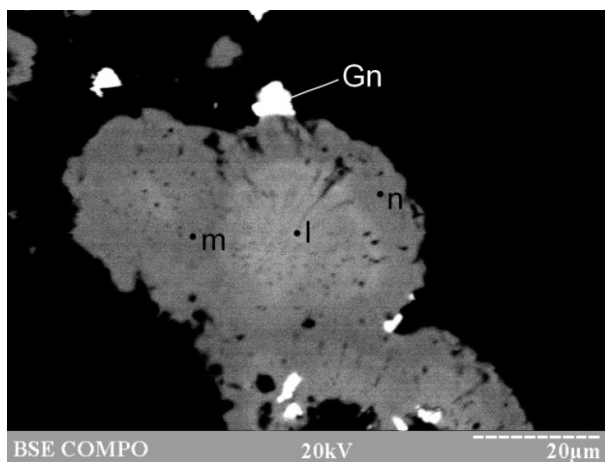

**Figure S1-8.** Zoned reniform aggregate of Fe-, Ag-, Pb-, and Cd-bearing Zn sulfide (l, m, n) with galena crystals on top; sample 241-2/1-11, I #34926.

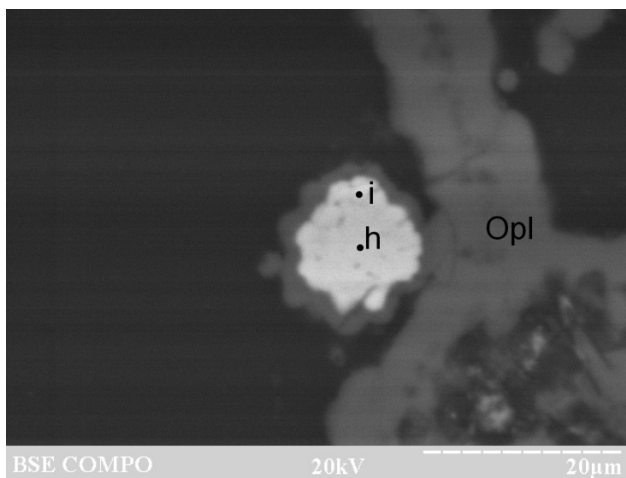

**Figure S1-9.** Pb-bearing (h) and Pb-free (i) framboidal sphalerite; sample 241-2/2-2, I #35658.

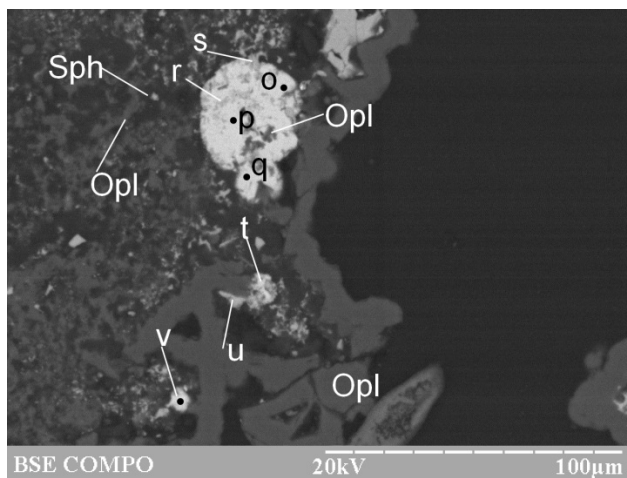

**Figure S1-10.** Replacement of reniform Cd-bearing sphalerite (r, s, u) by Zn-bearing CdS phase (o, p, q, t, v); sample 241, I #35722.

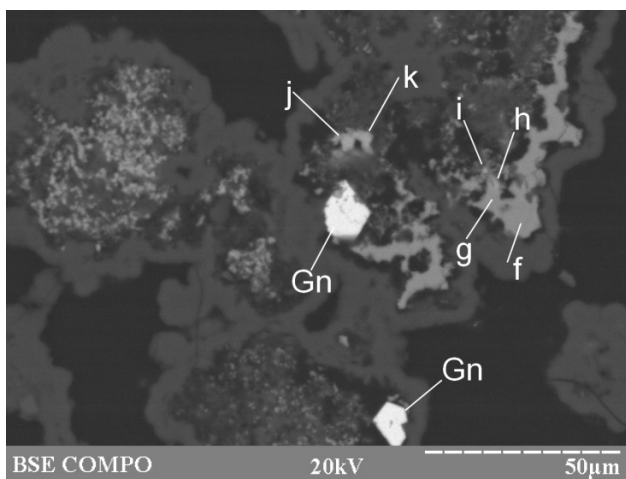

**Figure S1-11.** Galena and sphalerite (f, j) surrounded by a CdS-ZnS phase (h, i, j, k); sample 241-2/2-2, I #35620.

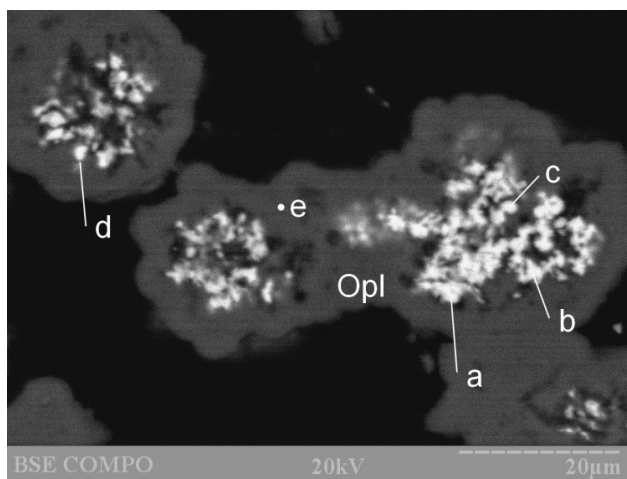

**Figure S1-12.** High-Cd sphalerite (a, b, c, d) in opal (e); sample 241-2/2-2, I #35619.

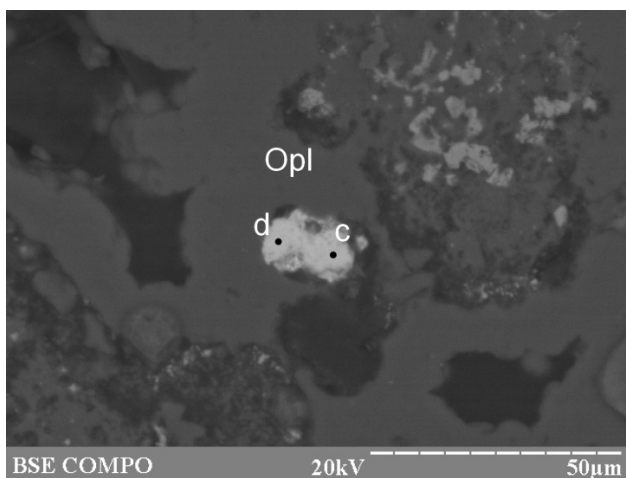

**Figure S1-13.** Aggregate of CdS phase (c, d) in opal; sample 241, I #35715.

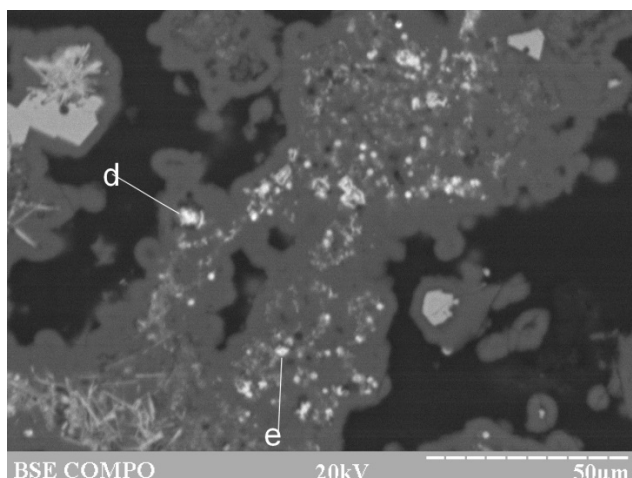

**Figure S1-14.** Inclusions of CdS phase (d, e) in opal; sample 241-2/2-2, I #35626.

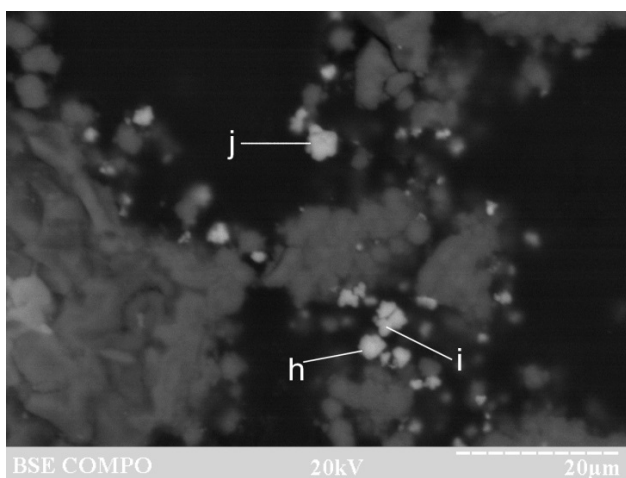

**Figure S1-15.** CdS phase (all points) on top of opal aggregates; sample 241-2/2-5, I #35002.

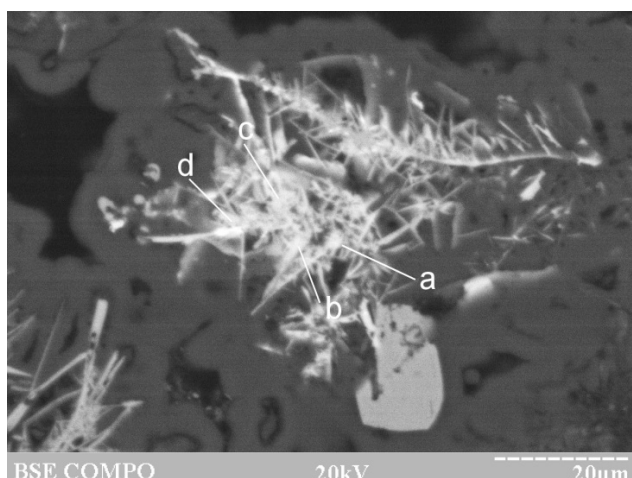

**Figure S1-16.** Latticework structure of acicular CdS phase (a, b, c, d); sample 241-2/2-2, I #35654.

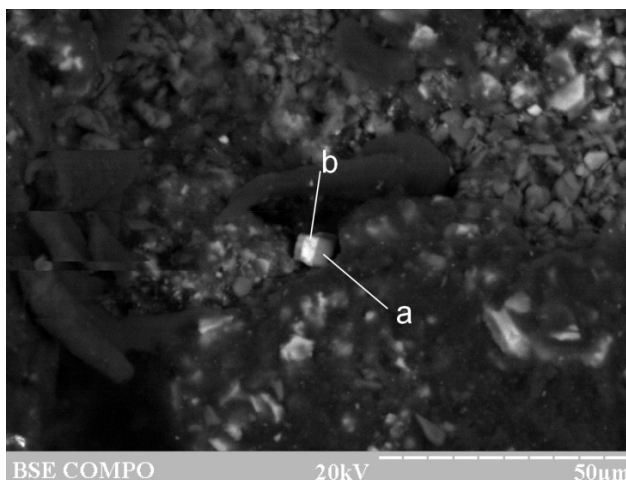

**Figure S1-17.** Platy lollingite grains (a) around platy As-bearing galena crystal (b); sample 241-2/2-4, I #35754.

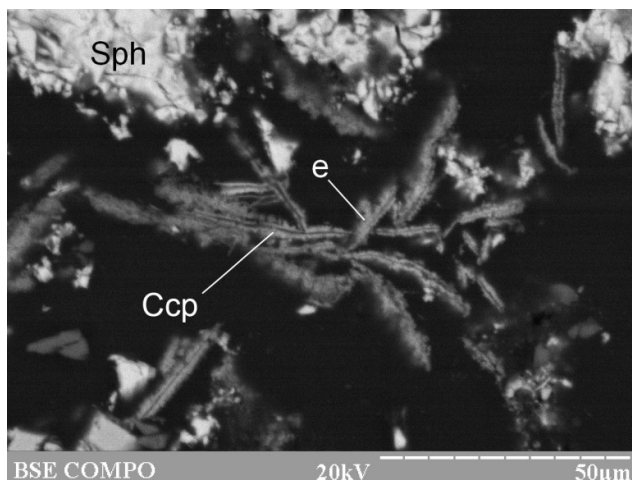

**Figure S1-18.** Filamentous chalcopyrite (Ccp) between sphalerite in opal (e); sample 241-2/3-2, I #35618.

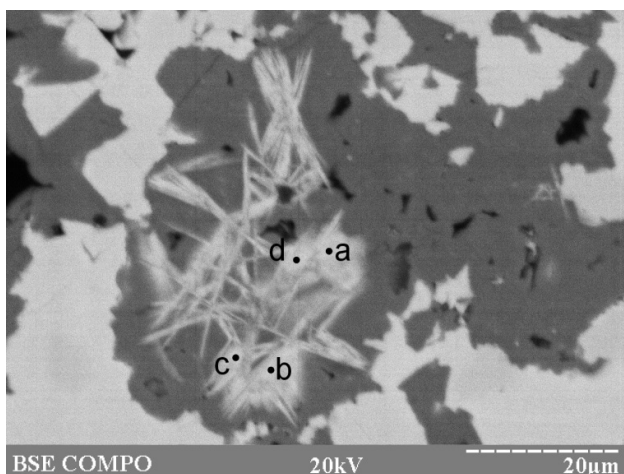

**Figure S1-19.** Radial aggregates of acicular covellite crystals (a–d) (Figure 7b) in Fe-oxyhydroxides, which replace Zn sulfide; sample 241-2/2-5, I #36257.

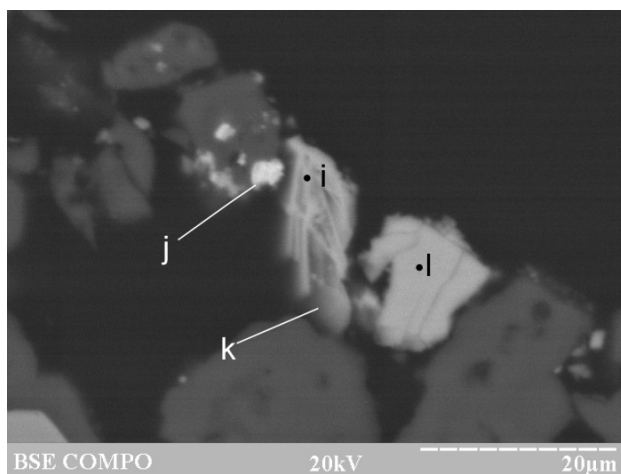

**Figure S1-20.** Low-Fe and low-Zn (i) and high-Fe and high-Zn (j, k) covellite and sphalerite (l); sample 241-2/2-2, I #35652.

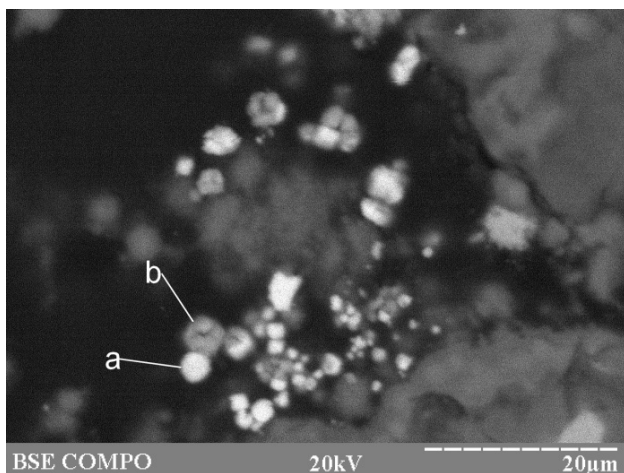

**Figure S1-21.** Assemblage of rounded grains of Ag-bearing covellite (b) and acanthite (a); sample 241-2/2-5, I #34999.

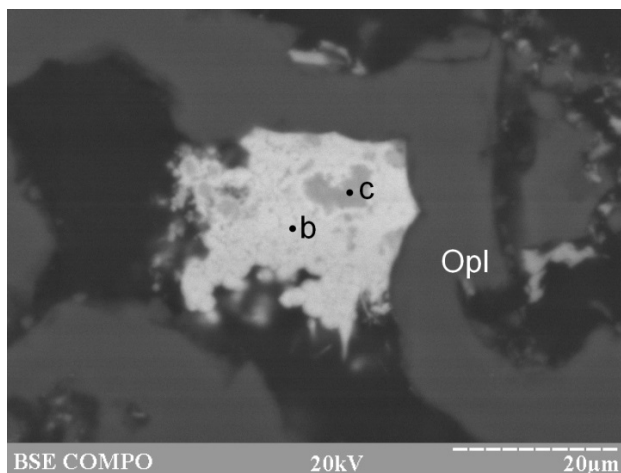

**Figure S1-22.** Replacement of Ag-Sb-bearing covellite (c) by an Cd-bearing Ag-Sb-Cu sulfosalt (b); sample 241, I #35747.

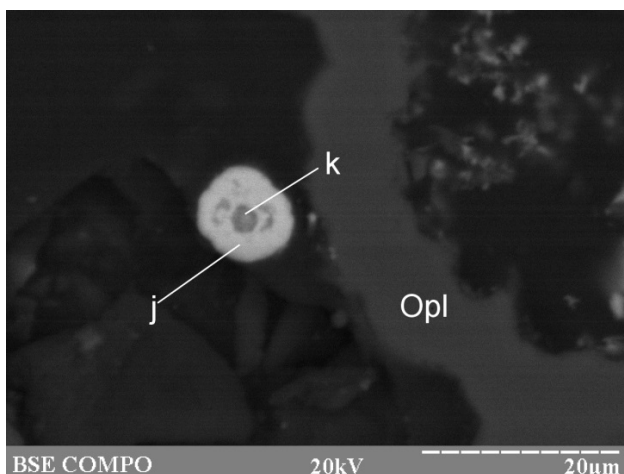

**Figure S1-23.** Zoned spherule with Ag-Sb-bearing covellite in the center (k) replaced by an Ag-Sb-Cu sulfosalt (j); sample 241, I #35739.

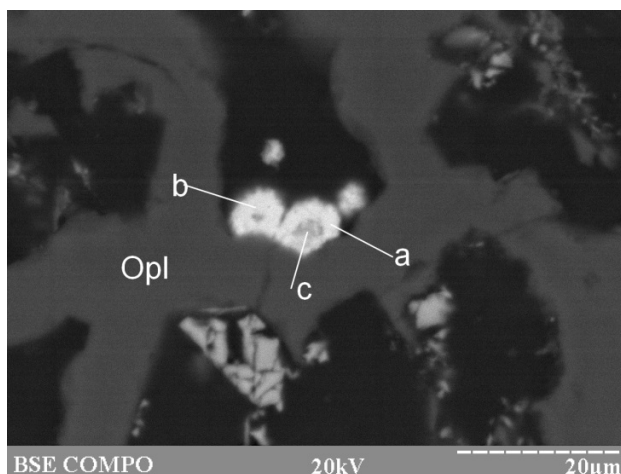

**Figure S1-24.** Reniform aggregates exhibiting the replacement of Ag-Sb-bearing covellite (c) by an Ag-Cu-Sb sulfosalt (a, b); sample 241, I #35736.



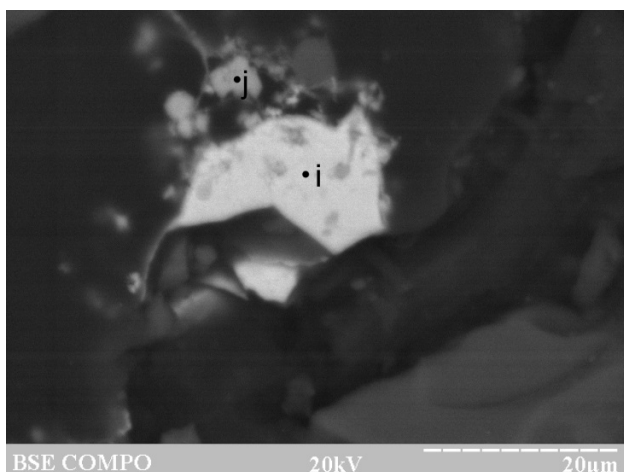

**Figure S1-25.** Assemblage of Ag-Sb-bearing covellite (j) and a Cu-bearing Ag-Sb sulfosalt ("pyrargyrite") (i); sample 241, I #35719.

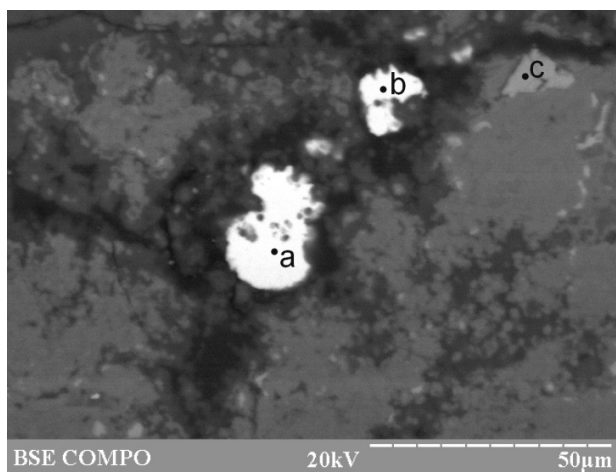

**Figure S1-26.** Galena (a, b) and relict high-Fe Zn sulfide (c) in Fe-oxyhydroxides; sample 241-2/2-5, I #34899.

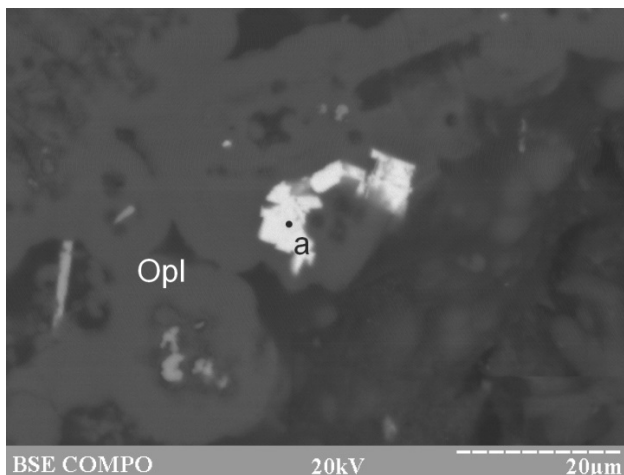

**Figure S1-27.** Interstitial galena crystals (a) in opal; sample 241-2/2-2, I #35659.

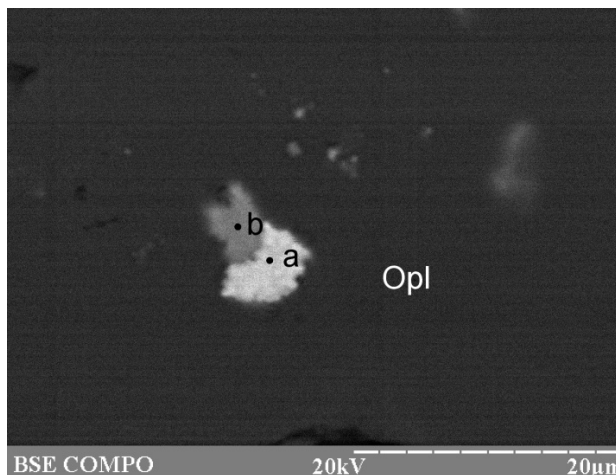

**Figure S1-28.** Replacement of sphalerite (b) by As-bearing galena (a) in opal; sample 241, I #35753.

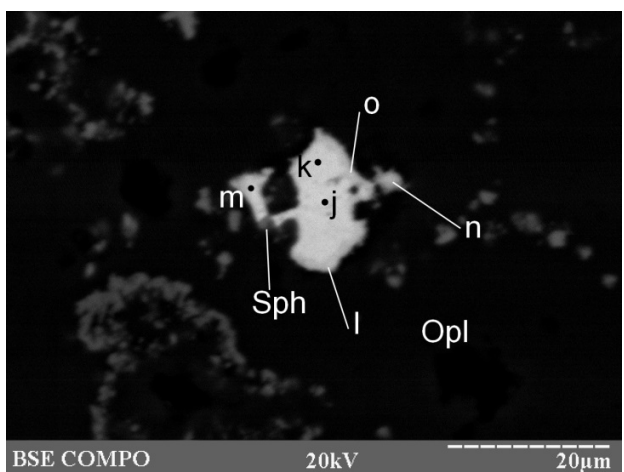

**Figure S1-29.** As-bearing galena crystals (j) replaced by a secondary As-O phase (other points); sample 241, I #35745.

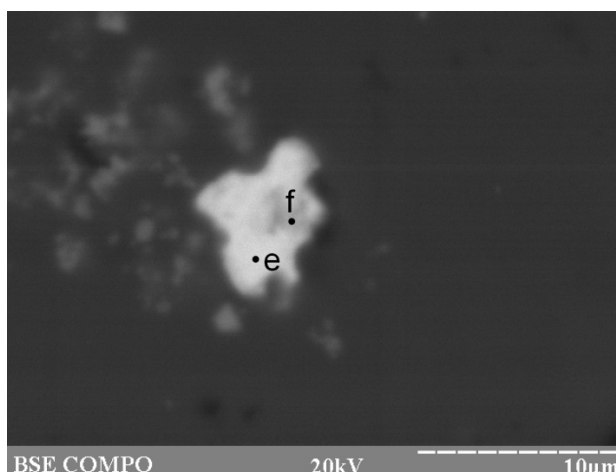

**Figure S1-30.** As-bearing galena crystals (e) replaced by a secondary As-O phase (f); sample 241, I #35743.

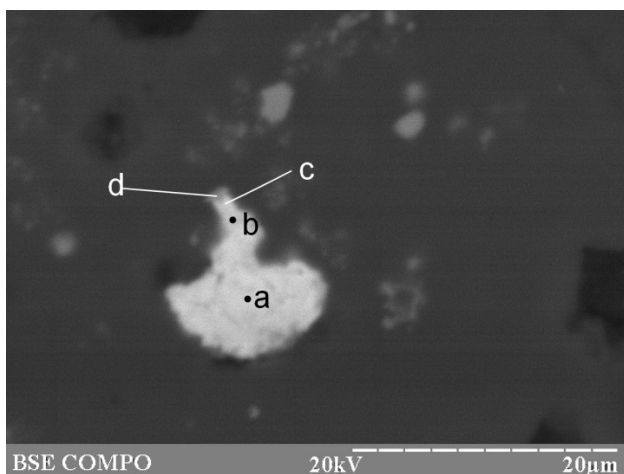

**Figure S1-31.** As-free (a) and As-bearing galena grains (b, c) replaced by a secondary As-O phase (d); sample 241, I #35742.

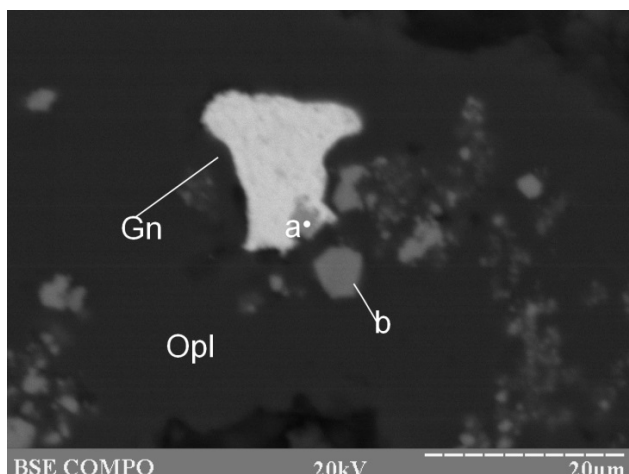

**Figure S1-32.** Replacement of galena by Ag- and Cd-bearing Zn sulfide (a) and inclusions of high-Fe Cd-free Zn sulfide in opal (b); sample 241, I #35717.

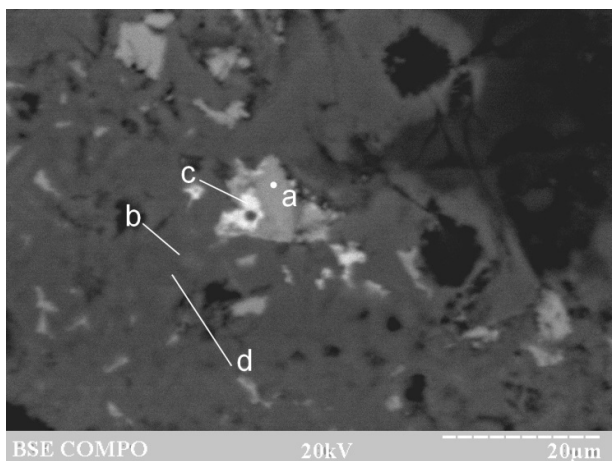

**Figure S1-33.** High-Fe sphalerite (a) with inclusions of an Au-Cu-S phase (c) replaced by Fe-oxyhydroxides (b, d); sample 241-2/2-4, I #35757.

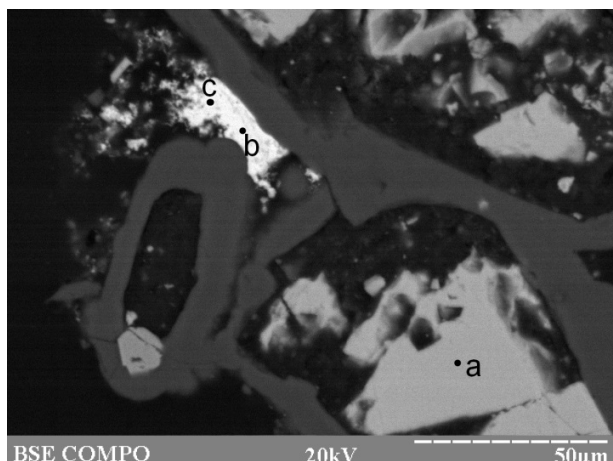

**Figure S1-34.** High-Fe Zn sulfide crystals (a) overgrown by opal with an interstitial Ag-Sb-Cu sulfosalt (c, b); sample 241-2/1-11, I #34921.

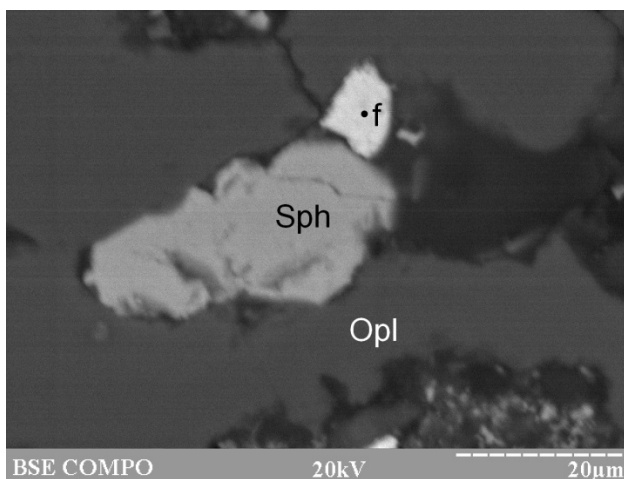

**Figure S1-35.** Aggregate of sphalerite and As-bearing Cu-bearing Ag-Sb sulfosalt ("miargyrite"); sample 241, I #35750.

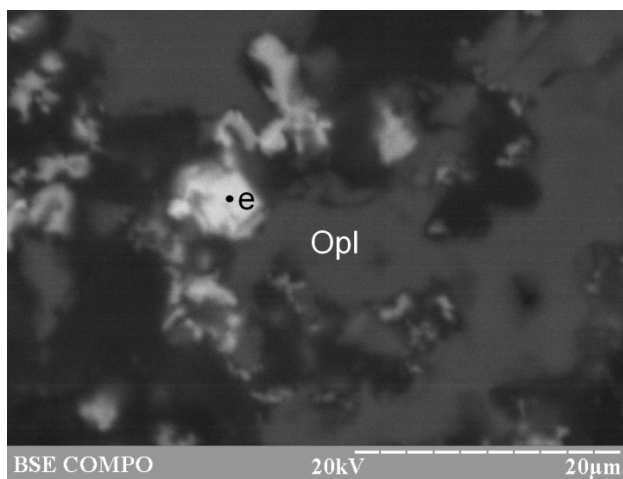

**Figure S1-36.** Interstitial aggregates of an Ag-Sb-Cu sulfosalt (e); sample 241, I #35749.

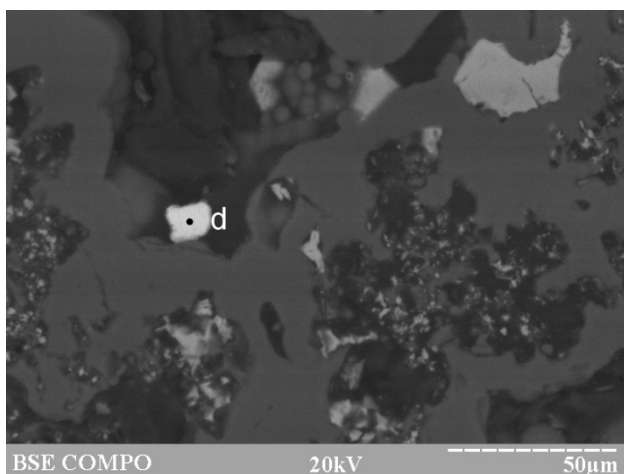

**Figure S1-37.** Subhedral crystal of Cu-bearing Ag-Sb sulfosalt (“argentotetrahedrite-Zn”) (d) on opal; sample 241, I #35748.]

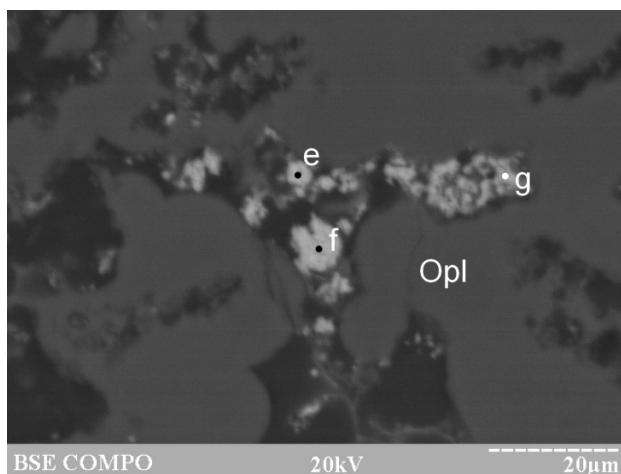

**Figure S1-38.** Interstitial aggregates of Ag-rich covellite (f), (g) and yarrowite (e) in opal; sample 241, I #35706.

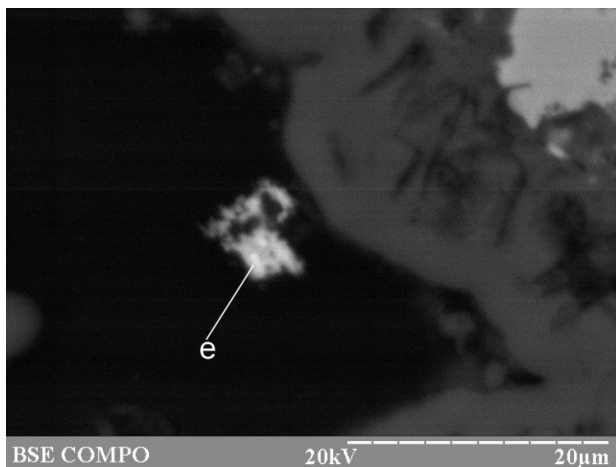

**Figure S1-39.** Cu-Ag-Sb sulfosalt (e) on opal with acicular native sulfur inclusions; sample 241-2/2-2, I #35655.

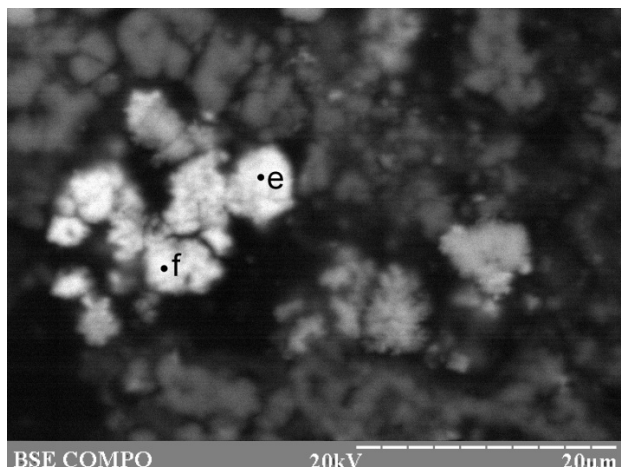

**Figure S1-40.** Granular aggregates of Cu-bearing acanthite (e, f); sample 241-2/2-5, I #34897.

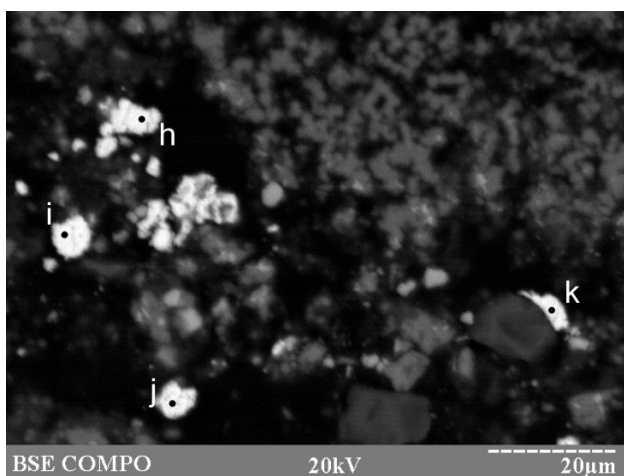

**Figure S1-41.** Fe-bearing acanthite grains (all points); sample 241-2/2-5, I #34901.

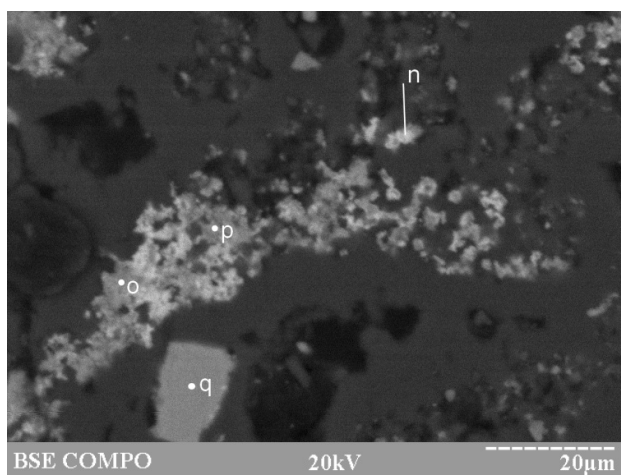

**Figure S1-42.** Sphalerite (q) replaced by fine aggregates of acanthite (n, p) locally intergrown with Cu sulfide (o); sample 241-2/1-11, I #34986.

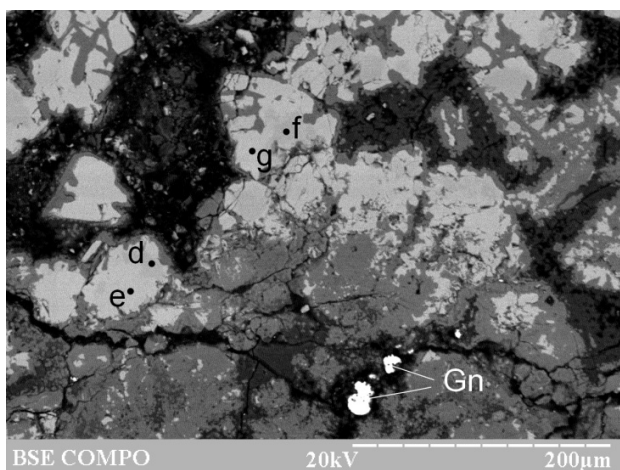

**Figure S1-43.** Wurtzite (e, g) and isocubanite (d, f) aggregates replaced by Fe-oxyhydroxides (dark gray); sample 241-2/2-5, I #34900.

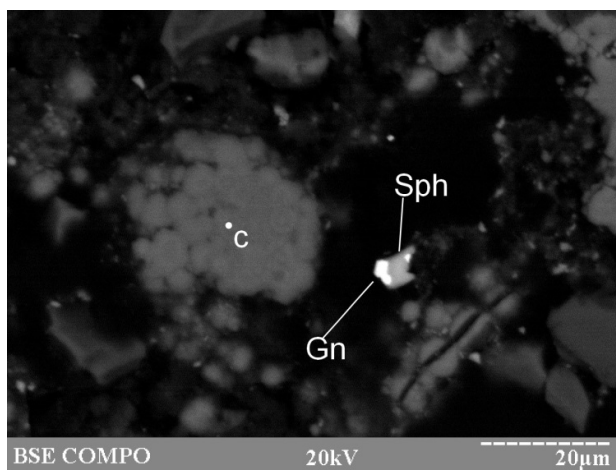

**Figure S1-44.** Fe-oxyhydroxides after spherulitic opal (c) and galena-sphalerite aggregate; sample 241-2/2-5, I #34992.

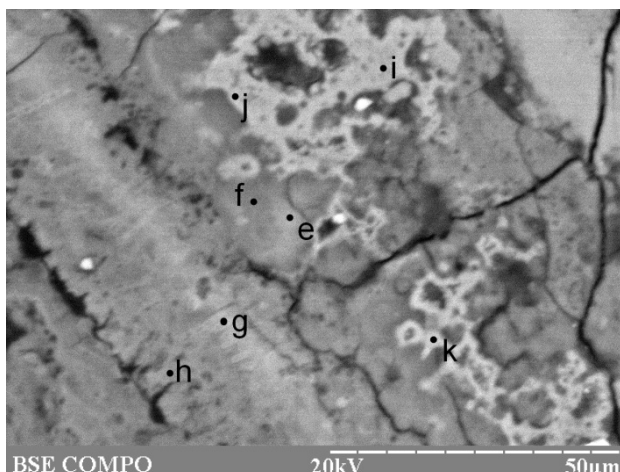

**Figure S1-45.** P-bearing Fe-oxyhydroxides of the outermost crust of Zn-rich chimney (i, j, k) replaced by P-bearing Mn-oxyhydroxides (h, g, f, e); sample 241-2/2-5, I #36258.

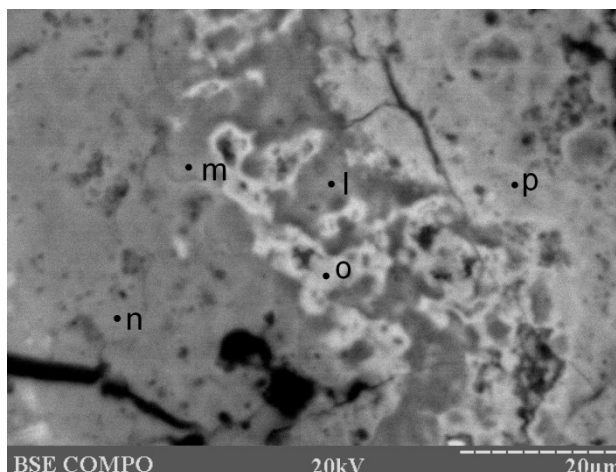

**Figure S1-46.** P-bearing Fe-oxyhydroxides of the outermost crust of Zn-rich chimney (o, p) replaced by P-bearing Mn-oxyhydroxides (l, m, n); sample 241-2/2-5, I #36259.

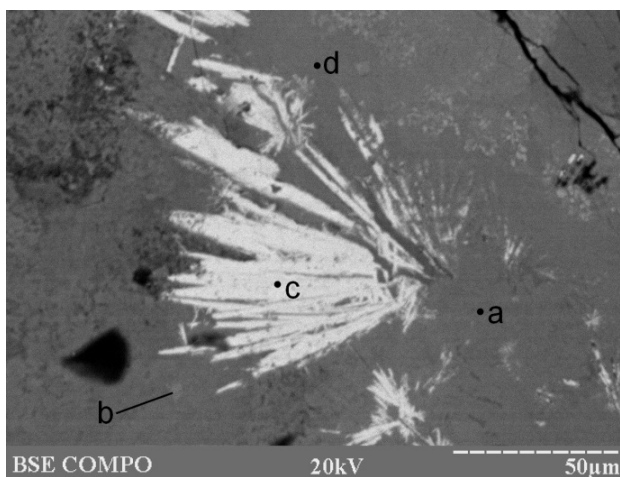

**Figure S1-47.** Radial barite aggregate (c) replaced by Fe-oxyhydroxides (a, b, d), sample 241-2/2-5, I #36457.

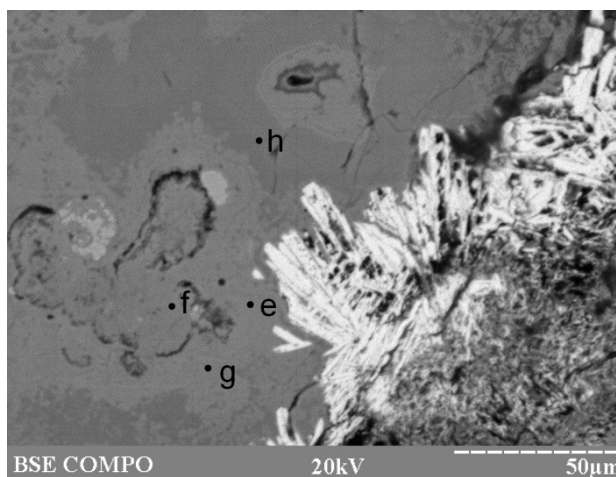

**Figure S1-50.** Radial barite aggregate (white) replaced by Fe-oxyhydroxides (e-h), sample 241-2/2-5, I #36458.



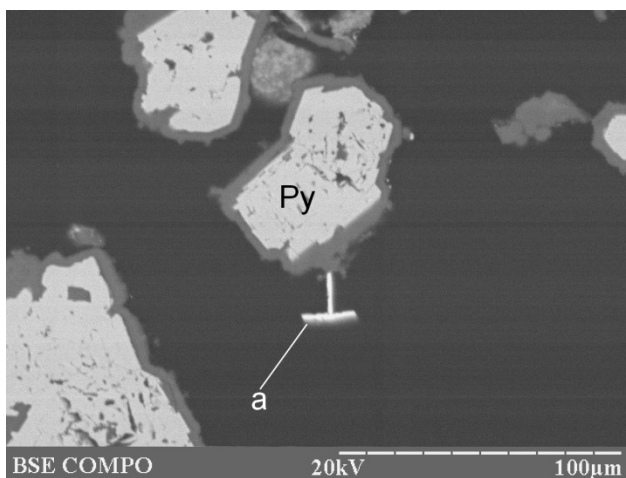

**Figure S1-49.** Barite crystals (a) on top of pyrite crystal rimmed by opal; sample 241-2/2-2, I #35627.

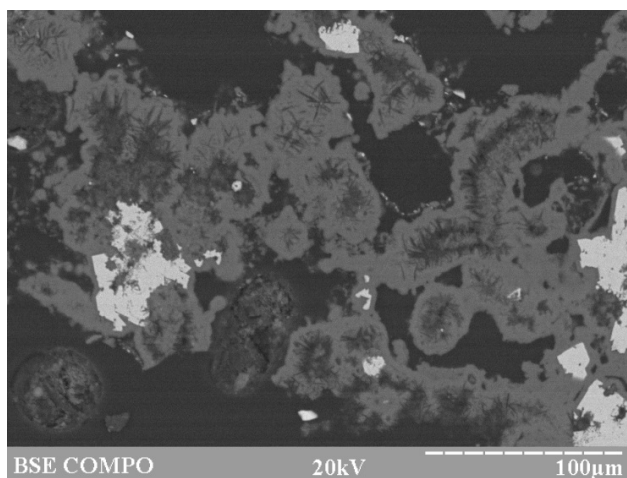

**Figure S1-50.** Radial aggregates of acicular native sulfur crystals rimmed by opal; sample 241-2/2-2, I #35623.

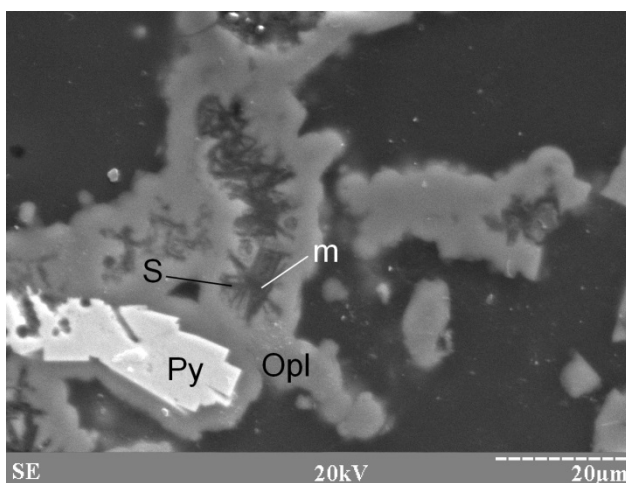

**Figure S1-51.** Radial aggregates of acicular native sulfur crystals rimmed by opal; sample 241-2/2-2, I #35622.

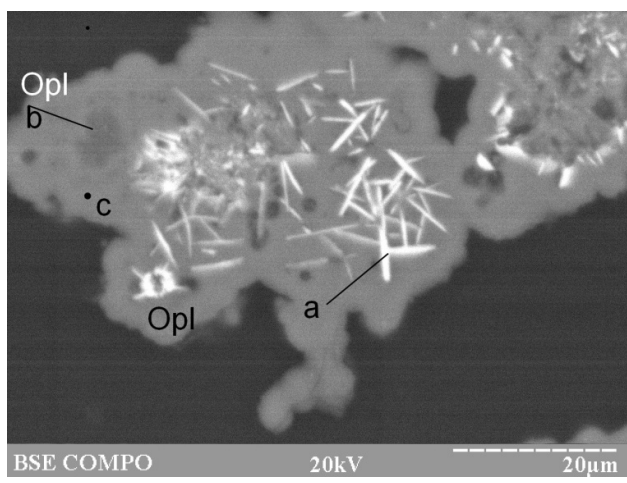

**Figure S1-52.** Acicular pyrrhotite crystals (a) overgrown by Al-rich opal (b) and low-Al opal (c); sample 241-2/2-2, I #35653.
