# Supplementary material for: The Heavy-Metal Fingerprint of the Irinovskoe Hydrothermal Sulfide Field, 13°20′ N, Mid-Atlantic Ridge
Source: MDPI journal article supplement (doi:10.3390/min12121626), 2022-12-16
Supplement: s1 [file s1]

## Supplementary Tables

**Table S1.** Chemical composition of Zn sulfides of the Irinovskoe HSF, wt%.

| Figure no.                           | Analysis no.        | Zn    | Fe    | Cd    | Cu   | Ag   | Pb   | S     | Total  | FeS, mol% | Formula                                                                                                           |
|--------------------------------------|---------------------|-------|-------|-------|------|------|------|-------|--------|-----------|-------------------------------------------------------------------------------------------------------------------|
| Wurtzite                             |                     |       |       |       |      |      |      |       |        |           |                                                                                                                   |
| S1-1                                 | 29016h              | 56.82 | 9.61  | 0.75  |      |      |      | 32.59 | 99.77  | 8.33      | (Zn <sub>0.86</sub> Fe <sub>0.17</sub> Cd <sub>0.01</sub> ) <sub>1.03</sub> Si <sub>1.00</sub>                    |
|                                      | 29016i              | 53.55 | 11.70 | 0.83  |      |      |      | 33.09 | 99.17  | 10.13     | (Zn <sub>0.79</sub> Fe <sub>0.20</sub> Cd <sub>0.01</sub> ) <sub>1.00</sub> Si <sub>1.00</sub>                    |
|                                      | 29016j              | 54.67 | 11.52 | 0.34  |      |      |      | 32.93 | 99.46  | 9.95      | (Zn <sub>0.81</sub> Fe <sub>0.20</sub> ) <sub>1.02</sub> Si <sub>1.00</sub>                                       |
| S1-34                                | 29001a              | 51.96 | 13.62 |       |      |      |      | 34.01 | 99.59  | 11.62     | (Zn <sub>0.75</sub> Fe <sub>0.23</sub> ) <sub>0.98</sub> Si <sub>1.00</sub>                                       |
| S1-43                                | 28131e              | 44.79 | 18.68 | 0.80  | 1.53 |      |      | 33.35 | 99.14  | 15.99     | (Zn <sub>0.66</sub> Fe <sub>0.32</sub> Cu <sub>0.02</sub> Cd <sub>0.01</sub> ) <sub>1.01</sub> Si <sub>1.00</sub> |
|                                      | 28131g              | 57.15 | 9.35  | 0.00  | 0.43 |      |      | 32.87 | 99.81  | 8.07      | (Zn <sub>0.85</sub> Fe <sub>0.16</sub> Cu <sub>0.01</sub> ) <sub>1.02</sub> Si <sub>1.00</sub>                    |
| Reniform sphalerite                  |                     |       |       |       |      |      |      |       |        |           |                                                                                                                   |
| 4b                                   | 29001i              | 59.72 | 3.69  |       |      | 2.05 | 1.86 | 32.75 | 100.08 | 3.26      | (Zn <sub>0.89</sub> Fe <sub>0.06</sub> Ag <sub>0.02</sub> ) <sub>0.98</sub> Si <sub>1.00</sub>                    |
|                                      | 29001j              | 59.78 | 2.38  | 0.28  | 0.13 | 1.40 | 3.69 | 32.03 | 99.70  | 2.14      | (Zn <sub>0.92</sub> Fe <sub>0.04</sub> Ag <sub>0.01</sub> ) <sub>0.98</sub> Si <sub>1.00</sub>                    |
|                                      | 29001k              | 59.86 | 4.59  | 0.45  |      |      | 2.04 | 32.72 | 99.66  | 4.04      | (Zn <sub>0.90</sub> Fe <sub>0.08</sub> Ag <sub>0.02</sub> ) <sub>0.98</sub> Si <sub>1.00</sub>                    |
| S1-8                                 | 29001l <sup>c</sup> | 56.19 | 2.72  | 0.31  |      | 2.82 | 6.61 | 30.61 | 99.26  | 2.53      | (Zn <sub>0.90</sub> Fe <sub>0.05</sub> Ag <sub>0.03</sub> ) <sub>0.98</sub> Si <sub>1.00</sub>                    |
|                                      | 29001m <sup>r</sup> | 57.13 | 2.77  | 0.32  |      | 2.58 | 4.99 | 31.54 | 99.31  | 2.53      | (Zn <sub>0.89</sub> Fe <sub>0.05</sub> Ag <sub>0.02</sub> ) <sub>0.97</sub> Si <sub>1.00</sub>                    |
|                                      | 29001n <sup>r</sup> | 60.32 | 4.80  | 0.23  |      | 1.14 | 0.58 | 32.61 | 99.68  | 4.21      | (Zn <sub>0.91</sub> Fe <sub>0.08</sub> Ag <sub>0.01</sub> ) <sub>1.00</sub> Si <sub>1.00</sub>                    |
| S1-10                                | 29031r              | 38.35 | 8.77  | 22.59 |      |      |      | 29.61 | 99.33  | 8.41      | (Zn <sub>0.64</sub> Cd <sub>0.22</sub> Fe <sub>0.17</sub> ) <sub>1.02</sub> Si <sub>1.00</sub>                    |
|                                      | 29031s              | 50.05 | 9.59  | 8.05  |      |      |      | 32.31 | 100.00 | 8.51      | (Zn <sub>0.76</sub> Fe <sub>0.17</sub> Cd <sub>0.07</sub> ) <sub>1.00</sub> Si <sub>1.00</sub>                    |
|                                      | 29031u              | 53.20 | 11.19 | 0.45  |      |      |      | 34.24 | 99.08  | 9.60      | (Zn <sub>0.76</sub> Fe <sub>0.19</sub> ) <sub>0.95</sub> Si <sub>1.00</sub>                                       |
| Framboidal sphalerite                |                     |       |       |       |      |      |      |       |        |           |                                                                                                                   |
| S1-9                                 | 29023h <sup>c</sup> | 60.79 | 2.05  |       |      |      | 2.88 | 33.44 | 99.16  | 1.81      | (Zn <sub>0.89</sub> Fe <sub>0.04</sub> ) <sub>0.93</sub> Si <sub>1.00</sub>                                       |
|                                      | 29023i <sup>r</sup> | 63.49 | 2.52  |       |      |      | 0.00 | 33.14 | 99.15  | 2.20      | (Zn <sub>0.94</sub> Fe <sub>0.04</sub> ) <sub>0.98</sub> Si <sub>1.00</sub>                                       |
| Microcrystalline sphalerite          |                     |       |       |       |      |      |      |       |        |           |                                                                                                                   |
| S1-20                                | 29021l              | 52.03 | 13.16 |       | 0.83 |      |      | 33.90 | 99.91  | 11.21     | (Zn <sub>0.75</sub> Fe <sub>0.22</sub> Cu <sub>0.01</sub> ) <sub>0.99</sub> Si <sub>1.00</sub>                    |
| S1-28                                | 29036b              | 57.96 | 3.28  |       |      | 1.12 | 5.13 | 31.57 | 99.06  | 2.99      | (Zn <sub>0.90</sub> Fe <sub>0.06</sub> Ag <sub>0.01</sub> ) <sub>0.97</sub> Si <sub>1.00</sub>                    |
| S1-32                                | 29031b              | 49.50 | 15.87 |       |      |      |      | 33.82 | 99.18  | 13.56     | (Zn <sub>0.72</sub> Fe <sub>0.27</sub> ) <sub>0.99</sub> Si <sub>1.00</sub>                                       |
| S1-33                                | 29039a              | 51.02 | 14.74 |       |      | 0.83 |      | 32.94 | 99.53  | 12.69     | (Zn <sub>0.76</sub> Fe <sub>0.26</sub> Ag <sub>0.01</sub> ) <sub>1.02</sub> Si <sub>1.00</sub>                    |
| S1-26                                | 28131c              | 49.48 | 15.70 |       | 0.25 |      |      | 33.63 | 99.06  | 13.44     | (Zn <sub>0.72</sub> Fe <sub>0.27</sub> ) <sub>0.99</sub> Si <sub>1.00</sub>                                       |
| Anhedral microcrystalline sphalerite |                     |       |       |       |      |      |      |       |        |           |                                                                                                                   |
| 4g                                   | 29006k <sup>1</sup> | 33.23 | 0.95  | 38.32 |      |      |      | 26.50 | 99.21  | 1.00      | (Zn <sub>0.61</sub> Cd <sub>0.41</sub> Fe <sub>0.02</sub> ) <sub>1.04</sub> Si <sub>1.00</sub>                    |
| 4g                                   | 29006l              | 48.35 | 1.43  | 20.09 |      |      |      | 29.31 | 99.17  | 1.38      | (Zn <sub>0.81</sub> Cd <sub>0.20</sub> Fe <sub>0.03</sub> ) <sub>1.04</sub> Si <sub>1.00</sub>                    |
| Anhedral microcrystalline sphalerite |                     |       |       |       |      |      |      |       |        |           |                                                                                                                   |

| Figure no. | Analysis no. | Zn    | Fe    | Cd    | Cu   | Ag | Pb   | S     | Total  | FeS, mol % | Formula                                                                                                          |
|------------|--------------|-------|-------|-------|------|----|------|-------|--------|------------|------------------------------------------------------------------------------------------------------------------|
| 5c         | 29022j       | 35.68 | 9.36  | 25.88 |      |    |      | 29.08 | 100.00 | 9.06       | (Zn <sub>0.60</sub> Cd <sub>0.25</sub> Fe <sub>0.18</sub> ) <sub>1.04</sub> S <sub>1.00</sub>                    |
|            | 29022k       | 47.75 | 12.58 | 6.82  |      |    |      | 32.84 | 100.00 | 11.04      | (Zn <sub>0.71</sub> Fe <sub>0.22</sub> Cu <sub>0.06</sub> ) <sub>0.99</sub> S <sub>1.00</sub>                    |
| S1-2       | 29000b       | 53.51 | 0.47  | 12.55 |      |    | 3.19 | 29.41 | 99.14  | 0.45       | (Zn <sub>0.89</sub> Cd <sub>0.12</sub> Fe <sub>0.01</sub> ) <sub>1.02</sub> S <sub>1.00</sub>                    |
|            | 29000a       | 51.43 | 13.12 | 0.56  |      |    | 0.89 | 34.05 | 100.06 | 11.22      | (Zn <sub>0.74</sub> Fe <sub>0.22</sub> ) <sub>0.97</sub> S <sub>1.00</sub>                                       |
| S1-3       | 29031n       | 59.36 | 6.81  |       |      |    |      | 33.44 | 99.61  | 5.88       | (Zn <sub>0.87</sub> Fe <sub>0.12</sub> ) <sub>0.99</sub> S <sub>1.00</sub>                                       |
| S1-4       | 29001d       | 54.19 | 10.96 | 0.19  | 0.40 |    |      | 33.44 | 99.18  | 9.45       | (Zn <sub>0.79</sub> Fe <sub>0.19</sub> Cu <sub>0.01</sub> ) <sub>0.99</sub> S <sub>1.00</sub>                    |
|            | 29001e       | 53.72 | 11.48 | 0.45  | 0.18 |    |      | 33.64 | 99.48  | 9.87       | (Zn <sub>0.78</sub> Fe <sub>0.20</sub> ) <sub>0.99</sub> S <sub>1.00</sub>                                       |
|            | 29001g       | 55.62 | 9.41  | 0.35  | 0.81 |    |      | 33.19 | 99.39  | 8.14       | (Zn <sub>0.82</sub> Fe <sub>0.16</sub> Cu <sub>0.01</sub> ) <sub>1.00</sub> S <sub>1.00</sub>                    |
|            | 29001h       | 52.88 | 12.89 | 0.44  | 0.00 |    |      | 33.64 | 99.85  | 11.03      | (Zn <sub>0.77</sub> Fe <sub>0.22</sub> ) <sub>0.99</sub> S <sub>1.00</sub>                                       |
| S1-11      | 29019f       | 49.44 | 15.08 | 0.00  | 0.73 |    |      | 33.86 | 99.11  | 12.89      | (Zn <sub>0.72</sub> Fe <sub>0.26</sub> Cu <sub>0.01</sub> ) <sub>0.98</sub> S <sub>1.00</sub>                    |
|            | 29019g       | 49.97 | 13.33 | 1.56  | 0.87 |    |      | 33.94 | 99.68  | 11.42      | (Zn <sub>0.72</sub> Fe <sub>0.23</sub> Cd <sub>0.01</sub> Cu <sub>0.01</sub> ) <sub>0.97</sub> S <sub>1.00</sub> |
|            | 29019h       | 38.75 | 5.63  | 22.75 | 1.34 |    | 2.00 | 29.61 | 100.08 | 5.45       | (Zn <sub>0.64</sub> Cd <sub>0.22</sub> Fe <sub>0.11</sub> Cu <sub>0.02</sub> ) <sub>0.99</sub> S <sub>1.00</sub> |
|            | 29019i       | 36.01 | 3.49  | 26.27 | 1.86 |    | 3.49 | 28.27 | 99.39  | 3.52       | (Zn <sub>0.62</sub> Cd <sub>0.27</sub> Fe <sub>0.07</sub> Cu <sub>0.03</sub> ) <sub>0.99</sub> S <sub>1.00</sub> |
|            | 29019j       | 32.43 | 0.83  | 38.19 | 1.12 |    | 0.00 | 26.92 | 99.49  | 0.87       | (Zn <sub>0.59</sub> Cd <sub>0.40</sub> Fe <sub>0.02</sub> Cu <sub>0.02</sub> ) <sub>1.03</sub> S <sub>1.00</sub> |
|            | 29019k       | 32.53 | 1.40  | 36.31 | 1.74 |    | 0.00 | 27.26 | 99.24  | 1.45       | (Zn <sub>0.59</sub> Cd <sub>0.38</sub> Fe <sub>0.03</sub> Cu <sub>0.03</sub> ) <sub>1.03</sub> S <sub>1.00</sub> |
| S1-12      | 29019a       | 43.76 | 1.96  | 23.29 | 0.86 |    |      | 29.42 | 99.29  | 1.90       | (Zn <sub>0.73</sub> Cd <sub>0.23</sub> Fe <sub>0.04</sub> Cu <sub>0.01</sub> ) <sub>1.01</sub> S <sub>1.00</sub> |
|            | 29019b       | 44.22 | 2.55  | 23.24 | 0.00 |    |      | 29.37 | 99.38  | 2.47       | (Zn <sub>0.74</sub> Cd <sub>0.23</sub> Fe <sub>0.05</sub> ) <sub>1.01</sub> S <sub>1.00</sub>                    |
|            | 29019c       | 42.45 | 1.32  | 26.53 | 0.00 |    |      | 28.95 | 99.25  | 1.30       | (Zn <sub>0.72</sub> Cd <sub>0.26</sub> Fe <sub>0.03</sub> ) <sub>1.01</sub> S <sub>1.00</sub>                    |
|            | 29019d       | 40.04 | 2.69  | 27.25 | 0.00 |    |      | 29.06 | 99.04  | 2.66       | (Zn <sub>0.68</sub> Cd <sub>0.27</sub> Fe <sub>0.05</sub> ) <sub>1.00</sub> S <sub>1.00</sub>                    |

Hereinafter, empty box, not determined; ¢, center; ¢, rim; <sup>1</sup>, the analyses contain 0.21 wt % Sb. The formulas of Zn sulfides are based on one S atom.

**Table S2.** Correlation coefficients between chemical elements in various Zn and Cd sulfides of the Irinovskoe HSF.

|                              | Zn-Fe | Zn-Cd | Fe-Cd | Fe-Ag | Fe-Pb | Ag-Pb | Zn-Pb | Cd-Pb |
|------------------------------|-------|-------|-------|-------|-------|-------|-------|-------|
| Zn sulfides                  |       |       |       |       |       |       |       |       |
| Wurtzite                     | -0.96 | 0.36  | -0.53 | 0.25  | -     | -     | -     | -     |
| Reniform sphalerite          | -0.58 | -0.91 | 0.52  | -0.85 | -0.67 | 0.80  | 0.12  | -0.36 |
| Framboidal sphalerite        | -0.96 | -     | -     | -     | -     | -     | -     | -     |
| Microcrystalline sphalerite  | -0.99 | -     | -     | -     | -     | -     | -     | -     |
| Acicular sphalerite*         | 0.75  | -0.93 | -0.94 | -     | -0.30 | -     | -0.85 | -0.60 |
| Anhedral sphalerite          | 0.64  | -0.93 | -0.87 | -     | -     | -     | -     | -     |
| Cd sulfides                  |       |       |       |       |       |       |       |       |
|                              | Zn-Fe | Zn-Cd | Fe-Cd | Cd-Ag | Cd-Cu | Zn-Cu |       |       |
| Anhedral to subhedral grains | 0.57  | -0.46 | -0.30 | -0.84 | 0.08  | -0.38 |       |       |
| Acicular crystals*           | -0.17 | -0.90 | -0.29 |       |       |       |       |       |
| Spongy aggregates            | 0.75  | -0.32 | -0.82 | -0.54 | -     | -     |       |       |
| All CdS phases               | 0.10  | -0.85 | -0.02 | -0.06 | 0.54  | -0.70 |       |       |

The correlation coefficients are calculated in Statistica v. 10 program on the basis of chemical composition of Zn sulfides presented in Tables 2 and SM-1. Red values are significant correlation coefficients at a probability level of <0.05. \*, all correlation coefficients are insignificant because of the low amount of analyses.

**Table SM3.** Chemical composition of Cd sulfides of the Irinovskoe HSF, wt%.

| Figure no.                             | Analysis no. | Cd    | Zn    | Fe    | Cu   | Pb   | Ag   | S     | Total  | Formula                                                                                                                             |
|----------------------------------------|--------------|-------|-------|-------|------|------|------|-------|--------|-------------------------------------------------------------------------------------------------------------------------------------|
| Anhedral grains and subhedral crystals |              |       |       |       |      |      |      |       |        |                                                                                                                                     |
| SM1-3                                  | 29031m       | 47.50 | 25.15 | 0.39  |      |      |      | 26.31 | 99.35  | (Cd <sub>0.51</sub> Zn <sub>0.47</sub> Fe <sub>0.01</sub> ) <sub>0.99</sub> S <sub>1.00</sub>                                       |
| SM1-10                                 | 29031o       | 51.10 | 22.66 | 0.00  |      |      |      | 25.61 | 99.37  | (Cd <sub>0.57</sub> Zn <sub>0.43</sub> Fe <sub>0.00</sub> ) <sub>1.00</sub> S <sub>1.00</sub>                                       |
|                                        | 29031p       | 55.76 | 18.63 | 0.00  |      |      |      | 24.90 | 99.29  | (Cd <sub>0.64</sub> Zn <sub>0.37</sub> Fe <sub>0.00</sub> ) <sub>1.01</sub> S <sub>1.00</sub>                                       |
|                                        | 29031q       | 48.46 | 24.87 | 0.00  |      |      |      | 26.35 | 99.68  | (Cd <sub>0.52</sub> Zn <sub>0.46</sub> ) <sub>0.99</sub> S <sub>1.00</sub>                                                          |
|                                        | 29031v       | 50.70 | 22.33 | 0.53  |      |      |      | 26.33 | 99.89  | (Cd <sub>0.55</sub> Zn <sub>0.42</sub> Fe <sub>0.01</sub> ) <sub>0.98</sub> S <sub>1.00</sub>                                       |
|                                        | 29031t       | 48.27 | 24.86 | 0.50  |      |      |      | 26.37 | 100.00 | (Cd <sub>0.52</sub> Zn <sub>0.46</sub> Fe <sub>0.01</sub> ) <sub>1.00</sub> S <sub>1.00</sub>                                       |
| SM1-13                                 | 29030d       | 55.36 | 18.50 | 0.62  |      |      |      | 24.78 | 99.26  | (Cd <sub>0.64</sub> Zn <sub>0.37</sub> Fe <sub>0.01</sub> ) <sub>1.02</sub> S <sub>1.00</sub>                                       |
|                                        | 29030c       | 54.30 | 19.20 | 0.56  |      |      |      | 25.39 | 99.45  | (Cd <sub>0.61</sub> Zn <sub>0.37</sub> Fe <sub>0.01</sub> ) <sub>0.99</sub> S <sub>1.00</sub>                                       |
| SM1-14                                 | 29020d       | 43.75 | 26.40 | 1.87  | 0.66 |      |      | 27.32 | 100.00 | (Cd <sub>0.46</sub> Zn <sub>0.47</sub> Fe <sub>0.04</sub> ) <sub>0.98</sub> S <sub>1.00</sub>                                       |
|                                        | 29020e       | 51.51 | 17.49 | 4.40  | 0.45 |      |      | 26.15 | 100.00 | (Cd <sub>0.56</sub> Zn <sub>0.33</sub> Fe <sub>0.10</sub> Cu <sub>0.01</sub> ) <sub>1.00</sub> S <sub>1.00</sub>                    |
| SM1-15                                 | 29011h       | 63.60 | 5.52  | 3.15  | 0.69 |      | 4.89 | 22.15 | 100.00 | (Cd <sub>0.82</sub> Zn <sub>0.12</sub> Fe <sub>0.08</sub> Ag <sub>0.07</sub> Cu <sub>0.02</sub> ) <sub>1.10</sub> S <sub>1.00</sub> |
|                                        | 29011i       | 62.16 | 7.54  | 4.19  | 0.47 |      | 3.91 | 21.73 | 100.00 | (Cd <sub>0.82</sub> Zn <sub>0.17</sub> Fe <sub>0.11</sub> Ag <sub>0.05</sub> Cu <sub>0.01</sub> ) <sub>1.16</sub> S <sub>1.00</sub> |
|                                        | 29011j       | 62.74 | 7.91  | 2.92  | 0.66 |      | 3.23 | 22.53 | 100.00 | (Cd <sub>0.79</sub> Zn <sub>0.17</sub> Fe <sub>0.07</sub> Ag <sub>0.04</sub> Cu <sub>0.01</sub> ) <sub>1.10</sub> S <sub>1.00</sub> |
| Acicular crystals                      |              |       |       |       |      |      |      |       |        |                                                                                                                                     |
| SM1-16                                 | 29022a       | 51.62 | 17.74 | 4.56  |      |      |      | 25.15 | 99.07  | (Cd <sub>0.59</sub> Zn <sub>0.35</sub> Fe <sub>0.10</sub> ) <sub>1.04</sub> S <sub>1.00</sub>                                       |
|                                        | 29022b       | 48.82 | 18.04 | 6.38  |      |      |      | 25.93 | 99.17  | (Cd <sub>0.54</sub> Zn <sub>0.34</sub> Fe <sub>0.14</sub> ) <sub>1.02</sub> S <sub>1.00</sub>                                       |
|                                        | 29022c       | 43.35 | 17.10 | 10.81 |      |      |      | 27.97 | 99.23  | (Cd <sub>0.44</sub> Zn <sub>0.30</sub> Fe <sub>0.22</sub> ) <sub>0.96</sub> S <sub>1.00</sub>                                       |
|                                        | 29022d       | 38.52 | 22.10 | 6.71  |      | 5.87 |      | 25.82 | 99.03  | (Cd <sub>0.43</sub> Zn <sub>0.42</sub> Fe <sub>0.15</sub> Pb <sub>0.04</sub> ) <sub>1.03</sub> S <sub>1.00</sub>                    |

The formulas of Cd sulfides are based on one S atom.

**Table S4.** Chemical composition of chalcopyrite, isocubanite, covellite and galena of the Irinovskoe HSF, wt%.

| Figure no.          | Analysis no.        | Cu    | Fe    | Zn   | Ag    | Sb    | Pb    | S     | Total  | Formula                                                                                    |
|---------------------|---------------------|-------|-------|------|-------|-------|-------|-------|--------|--------------------------------------------------------------------------------------------|
| Chalcopyrite        |                     |       |       |      |       |       |       |       |        |                                                                                            |
| SM1-4               | 29001f              | 30.25 | 28.04 | 5.97 |       |       |       | 34.97 | 99.23  | $\text{Cu}_{0.87}(\text{Fe}_{0.92}\text{Zn}_{0.17})_{1.09}\text{S}_{2.00}$                 |
| Isocubanite         |                     |       |       |      |       |       |       |       |        |                                                                                            |
| SM1-43              | 28131d              | 20.78 | 41.09 | 2.20 |       |       |       | 35.18 | 99.26  | $\text{Cu}_{0.89}(\text{Fe}_{2.01}\text{Zn}_{0.09})_{2.10}\text{S}_{3.00}$                 |
|                     | 28131f              | 20.17 | 41.85 | 2.38 |       |       |       | 34.84 | 99.24  | $\text{Cu}_{0.88}(\text{Fe}_{2.07}\text{Zn}_{0.10})_{2.10}\text{S}_{3.00}$                 |
| Acicular covellite  |                     |       |       |      |       |       |       |       |        |                                                                                            |
| SM1-20              | 29021i <sup>1</sup> | 63.55 | 0.70  | 0.26 |       |       |       | 34.07 | 99.19  | $(\text{Cu}_{0.94}\text{Fe}_{0.01})_{0.95}\text{S}_{1.00}$                                 |
|                     | 29021j              | 53.12 | 3.43  | 8.52 |       |       |       | 34.93 | 100.00 | $(\text{Cu}_{0.77}\text{Zn}_{0.12}\text{Fe}_{0.06})_{0.95}\text{S}_{1.00}$                 |
|                     | 29021k              | 53.95 | 3.36  | 7.35 |       |       |       | 35.34 | 100.00 | $(\text{Cu}_{0.77}\text{Zn}_{0.10}\text{Fe}_{0.05})_{0.93}\text{S}_{1.00}$                 |
| Ag-rich Cu sulfides |                     |       |       |      |       |       |       |       |        |                                                                                            |
| 7e                  | 29030b              | 22.84 |       | 1.61 | 35.72 | 17.45 |       | 21.53 | 99.15  | $(\text{Cu}_{0.54}\text{Ag}_{0.44}\text{Sb}_{0.21}\text{Zn}_{0.04})_{1.28}\text{S}_{1.00}$ |
| SM1-38              | 29029f              | 33.93 |       |      | 38.38 |       |       | 26.97 | 99.29  | $(\text{Cu}_{0.63}\text{Ag}_{0.42})_{1.06}\text{S}_{1.00}$                                 |
| SM1-24              | 29033c              | 30.26 |       | 0.62 | 40.67 | 3.19  |       | 24.75 | 99.49  | $(\text{Cu}_{0.62}\text{Ag}_{0.49}\text{Sb}_{0.03}\text{Zn}_{0.01})_{1.15}\text{S}_{1.00}$ |
| SM1-38              | 29029g              | 32.91 |       |      | 33.00 | 9.50  |       | 24.45 | 99.86  | $(\text{Cu}_{0.68}\text{Ag}_{0.40}\text{Sb}_{0.10})_{1.18}\text{S}_{1.00}$                 |
| SM1-42              | 29006o              | 43.80 |       | 1.53 | 29.85 |       |       | 24.81 | 100.00 | $(\text{Cu}_{0.89}\text{Ag}_{0.36}\text{Zn}_{0.03})_{1.28}\text{S}_{1.00}$                 |
| Galena              |                     |       |       |      |       |       |       |       |        |                                                                                            |
| SM1-26              | 28131a              |       |       |      |       |       | 86.35 | 13.42 | 99.77  | $\text{Pb}_{1.00}\text{S}_{1.00}$                                                          |
|                     | 28131b              |       |       |      |       |       | 86.47 | 13.41 | 99.89  | $\text{Pb}_{1.00}\text{S}_{1.00}$                                                          |
| SM1-27              | 29037a              |       |       |      |       |       | 85.88 | 13.52 | 99.39  | $\text{Pb}_{1.00}\text{S}_{1.00}$                                                          |
| SM1-31              | 29032a              |       |       |      |       |       | 85.58 | 13.61 | 99.20  | $\text{Pb}_{0.97}\text{S}_{1.00}$                                                          |

<sup>1</sup>, analysis contains 0.61 wt % Co. The formulas of minerals are based on two (chalcopyrite), three (isocubanite), and one (covellite and galena) S atoms.

**Table S5.** Chemical composition of non-stoichiometric Ag–Sb–Cu minerals of the Irinovskoe HSF, wt%.

| Figure no. | Analysis no.        | Ag    | Cu    | Sb    | Zn   | S     | Total  |
|------------|---------------------|-------|-------|-------|------|-------|--------|
| 9d         | 29033d              | 55.47 | 11.68 | 12.17 | 1.13 | 18.58 | 99.03  |
| SM1-22     | 29034b <sup>1</sup> | 60.29 | 9.63  | 12.69 | 1.20 | 14.61 | 99.10  |
| SM1-23     | 29033j              | 54.09 | 12.70 | 12.95 | 0.84 | 19.15 | 99.73  |
| SM1-24     | 29033a              | 56.63 | 12.06 | 10.34 | 0.75 | 19.43 | 99.20  |
| SM1-24     | 29033b              | 55.91 | 12.58 | 10.41 | 0.74 | 19.63 | 99.28  |
| SM1-34     | 29001b              | 59.70 | 5.26  | 12.21 | 1.39 | 20.67 | 99.23  |
| SM1-34     | 29001c              | 62.30 | 6.63  | 11.27 | 1.13 | 18.55 | 99.89  |
| SM1-36     | 29034e <sup>2</sup> | 62.59 | 6.08  | 11.19 | 1.31 | 17.90 | 99.42  |
| SM1-39     | 29022e <sup>3</sup> | 41.79 | 20.12 | 14.44 |      | 22.80 | 100.00 |

The analyses contain 0.69 wt % Cd (<sup>1</sup>), 0.35 wt % As (<sup>2</sup>) and 0.84 wt % Fe (<sup>3</sup>).

**Table S6.** Chemical composition of Fe- and Mn-oxyhydroxides of the Irinovskoe HSF, wt%.

| Figure no.                                                            | Analysis no.        | MnO   | FeO   | ZnO   | SiO <sub>2</sub> | Al <sub>2</sub> O <sub>3</sub> | CaO  | MgO  | P <sub>2</sub> O <sub>5</sub> | SO <sub>3</sub> | Cl   | K <sub>2</sub> O | V <sub>2</sub> O <sub>5</sub> | CoO  | NiO  | PbO  | TiO <sub>2</sub> | Total |
|-----------------------------------------------------------------------|---------------------|-------|-------|-------|------------------|--------------------------------|------|------|-------------------------------|-----------------|------|------------------|-------------------------------|------|------|------|------------------|-------|
| Fe-oxyhydroxides after opal                                           |                     |       |       |       |                  |                                |      |      |                               |                 |      |                  |                               |      |      |      |                  |       |
| SM1-44                                                                | 29009c              |       | 54.60 | 3.16  | 18.26            | 3.55                           |      |      |                               | 2.00            | 0.22 |                  |                               |      |      |      |                  | 81.79 |
|                                                                       | 29008c              |       | 51.65 | 1.47  | 18.56            | 3.05                           |      |      |                               | 2.02            |      |                  |                               |      |      |      |                  | 76.75 |
|                                                                       | 29040b              |       | 53.91 | 1.03  | 15.58            | 3.03                           |      |      |                               | 1.65            |      |                  |                               |      |      |      |                  | 75.21 |
| Fe-oxyhydroxides after ZnS                                            |                     |       |       |       |                  |                                |      |      |                               |                 |      |                  |                               |      |      |      |                  |       |
| SM1-33                                                                | 29039b <sup>1</sup> |       | 39.08 | 5.28  | 5.45             | 2.11                           |      |      |                               | 14.37           | 0.15 |                  |                               |      |      |      |                  | 82.82 |
|                                                                       | 29039d              |       | 55.48 | 4.00  | 6.44             | 2.62                           |      |      |                               | 2.55            | 0.26 |                  |                               |      |      |      |                  | 71.35 |
|                                                                       | 29038e              |       | 52.17 | 6.44  | 7.51             | 3.41                           | 0.19 |      |                               | 3.59            | 0.24 |                  |                               |      |      |      |                  | 73.54 |
| Mn-free Fe-oxyhydroxides from the outer crust                         |                     |       |       |       |                  |                                |      |      |                               |                 |      |                  |                               |      |      |      |                  |       |
| 10c                                                                   | 28130h              |       | 57.72 | 3.92  | 7.28             | 2.71                           | 0.39 | 0.77 | 1.65                          | 2.36            | 0.27 |                  |                               |      |      |      |                  | 77.06 |
| SM1-47                                                                | 29046b              |       | 58.95 | 3.69  | 5.30             | 0.93                           | 0.13 | 0.00 | 0.70                          | 1.72            | 0.45 |                  |                               |      |      | 0.48 |                  | 72.35 |
|                                                                       | 29046a              |       | 58.65 | 4.14  | 7.06             | 1.41                           | 0.27 | 0.41 | 0.58                          | 0.71            | 0.55 |                  |                               |      |      | 0.78 |                  | 74.55 |
|                                                                       | 29046d              |       | 51.15 | 2.93  | 7.83             | 3.25                           | 0.52 | 1.10 | 0.40                          | 2.34            | 0.42 |                  |                               |      |      | 0.38 |                  | 70.44 |
| SM1-48                                                                | 29046e <sup>2</sup> |       | 57.24 | 2.75  | 5.71             | 0.75                           | 0.41 | 0.57 | 1.11                          | 0.84            | 0.47 |                  |                               |      |      | 0.43 |                  | 70.52 |
|                                                                       | 29046f <sup>3</sup> |       | 55.97 | 3.11  | 5.64             | 1.60                           | 0.33 | 0.31 | 1.19                          | 1.01            | 0.35 |                  |                               |      |      | 0.62 |                  | 70.51 |
|                                                                       | 29046g <sup>4</sup> |       | 55.07 | 2.64  | 7.25             | 0.75                           | 0.33 | 0.97 | 0.49                          | 0.87            | 0.31 |                  |                               |      |      | 0.60 |                  | 69.53 |
|                                                                       | 29046h              |       | 50.30 | 2.50  | 7.73             | 3.27                           | 0.64 | 0.75 | 1.26                          | 2.12            | 0.37 |                  |                               |      |      | 0.79 |                  | 69.73 |
| Mixed aggregates of Fe- and Mn-oxyhydroxides from the outermost crust |                     |       |       |       |                  |                                |      |      |                               |                 |      |                  |                               |      |      |      |                  |       |
| SM1-45                                                                | 29045e              | 27.22 | 14.06 | 11.52 | 4.49             | 1.42                           | 1.61 | 0.92 | 0.63                          | 6.87            | 0.25 | 0.66             | 0.33                          | 0.78 | 0.32 | 0.72 | 0.32             | 72.14 |
|                                                                       | 29045f              | 24.94 | 12.20 | 9.08  | 4.42             | 1.23                           | 1.18 | 0.58 | 0.57                          | 6.11            | 0.19 | 0.55             |                               | 0.79 | 0.26 |      |                  | 62.09 |
|                                                                       | 29045g              | 38.54 | 6.59  | 15.82 | 2.36             | 1.15                           | 1.95 | 2.09 | 0.28                          | 2.56            | 0.19 | 0.20             | 0.36                          |      | 0.26 |      |                  | 72.34 |
|                                                                       | 29045h              | 23.42 | 17.51 | 7.66  | 7.19             | 1.74                           | 2.39 | 2.30 | 1.03                          | 0.99            | 0.55 |                  |                               |      |      |      |                  | 64.79 |
|                                                                       | 29045i              | 1.12  | 57.74 | 6.65  | 5.70             | 0.88                           | 0.68 | 0.46 | 1.54                          | 1.86            | 0.16 |                  | 0.73                          |      |      |      |                  | 77.53 |
|                                                                       | 29045j              | 8.20  | 42.62 | 6.74  | 5.52             | 1.17                           | 1.54 | 0.86 | 1.02                          | 5.39            | 0.20 | 0.31             | 0.65                          | 0.42 |      |      |                  | 74.64 |
|                                                                       | 29045k              | 7.20  | 46.95 | 6.74  | 6.30             | 0.96                           | 0.62 | 0.69 | 1.36                          | 4.48            | 0.15 | 0.27             | 0.66                          | 0.00 |      |      | 0.38             | 76.77 |
| SM1-46                                                                | 29045l              | 17.65 | 19.33 | 10.26 | 7.50             | 3.60                           | 1.25 | 0.94 | 2.08                          | 5.27            | 0.30 | 0.41             | 0.25                          | 1.85 |      | 1.24 | 0.37             | 72.28 |
|                                                                       | 29045m              | 18.99 | 19.36 | 10.14 | 7.24             | 3.26                           | 1.11 | 1.05 | 0.95                          | 5.27            | 0.33 | 0.37             | 0.37                          | 2.26 |      | 1.87 | 0.36             | 72.93 |
|                                                                       | 29045n              | 25.23 | 8.51  | 10.90 | 7.24             | 2.88                           | 1.21 | 1.58 | 0.34                          | 3.44            | 0.46 | 0.21             | 0.29                          | 2.95 |      | 1.33 | 0.30             | 66.87 |
|                                                                       | 29045o              | 4.85  | 46.73 | 7.04  | 6.99             | 1.58                           | 0.80 | 0.83 | 1.62                          | 5.55            | 0.21 | 0.34             | 0.55                          | 0.20 |      | 0.81 | 0.39             | 78.48 |
|                                                                       | 29045p              | 4.08  | 46.72 | 4.38  | 5.24             | 1.12                           | 1.65 | 0.36 | 2.02                          | 2.86            | 0.33 | 0.17             | 0.55                          | 0.13 |      | 1.23 | 0.42             | 71.24 |

\*, The analyses contain: <sup>1</sup>, 13.37 wt % Ag<sub>2</sub>O and 3.01 Cu<sub>2</sub>O; <sup>2,3,4</sup>, 0.20, 0.36 and 0.26 wt % Cu<sub>2</sub>O, respectively.

**Table S7.** Chemical composition of baryte and anglesite of the Irinovskoe HSF, wt%.

| Figure no. | Analysis no. | BaO   | SrO  | PbO   | FeO  | CaO  | SO <sub>3</sub> | Total  |
|------------|--------------|-------|------|-------|------|------|-----------------|--------|
| Baryte     |              |       |      |       |      |      |                 |        |
| 10c        | 28130g       | 57.02 | 6.04 |       | 0.59 | 0.36 | 35.61           | 99.62  |
| SM1-47     | 29046c       | 56.46 | 5.32 |       | 1.06 | 0.35 | 36.10           | 99.29  |
| SM1-49     | 29021a       | 56.90 | 5.32 |       | 0.69 | 0.78 | 35.54           | 99.22  |
| Anglesite  |              |       |      |       |      |      |                 |        |
| 10d        | 29021b       |       |      | 75.10 |      |      | 24.90           | 100.00 |
|            | 29021c       |       |      | 74.96 |      |      | 25.04           | 100.00 |
|            | 29021d       |       |      | 73.73 |      |      | 26.27           | 100.00 |

**Table S8.** Analytical uncertainties for AAA-based contents of chemical elements of chimney samples from the Irinovskoe HSF, ppm.

| Sample                              | Fe*   | Cu     | Zn     | Cd     | Pb     | Co     | Ni     | Au    | Ag     |
|-------------------------------------|-------|--------|--------|--------|--------|--------|--------|-------|--------|
| IMin data                           |       |        |        |        |        |        |        |       |        |
| 241-1/1                             | ±0.59 | ±11490 | ±911   | ±9.44  | ±6.56  | ±57.51 | ±17.64 | ±1.68 | ±9.02  |
| 241-2/2                             | ±0.52 | ±2048  | ±4140  | ±77.35 | ±44.28 | ±126   | ±10.63 | ±2.27 | ±27.18 |
| 241-2/3                             | ±0.47 | ±1077  | ±6213  | ±220   | ±286   | ±47.97 | ±11.03 | ±1.80 | ±48.07 |
| PMGE data (unpublished report 2011) |       |        |        |        |        |        |        |       |        |
| 241                                 | ±0.38 | ±0.20* | ±0.59* | –      | ±143   | ±68.31 | ±31.52 | ±2.27 | ±24.21 |
| 241-m-2                             | ±0.62 | ±0.15* | ±0.53* | ±181   | ±295   | ±65.52 | ±15.48 | ±0.84 | ±37.94 |

\*, wt %

**Table S9.** Analytical uncertainties for ICP-MS-based contents of chemical elements of chimney samples from the Irinovskoe HSF, ppm.

| Sample  | Ti   | V    | Cr  | Mn   | As  | Se   | Sr   | Mo   | Sn   | Sb   | Te  | Ba  | Tl  | Bi  | U   |
|---------|------|------|-----|------|-----|------|------|------|------|------|-----|-----|-----|-----|-----|
| 241-1/1 | 10.1 | 3.0  | 4.5 | 7.1  | 74  | 47   | 11.7 | 13.2 | 30.9 | 1.7  | 1.7 | 80  | 0.2 | 2.0 | 0.2 |
| 241-2/2 | 28.0 | 3.1  | 4.9 | 51.7 | 137 | 10.5 | 7.6  | 15   | 76   | 42.8 | 0.3 | 97  | 1.7 | 0.8 | 1.0 |
| 241-2/3 | 5.43 | 12.9 | 4.4 | 172  | 151 | 5.1  | 41.2 | 22.3 | 67   | 68   | 0.1 | 536 | 2.7 | 0.1 | 0.8 |

**Table S10.** Composition of primary reactants in calculations (atomic amounts).

|    | Basaltic glass (1 kg)*<br>[39] | Peridotite (1 kg)**<br>[40] | Seawater (per 1 kg H <sub>2</sub> O)<br>[41] | Volcanic gas (10 g)<br>[42] |
|----|--------------------------------|-----------------------------|----------------------------------------------|-----------------------------|
| Ag | 2.1×10 <sup>-7</sup>           | 1.98×10 <sup>-7</sup>       | 1.9×10 <sup>-11</sup>                        | 9.5×10 <sup>-10</sup>       |
| Al | 2.97                           | 0.563                       | 1.1×10 <sup>-9</sup>                         |                             |
| As | 2.27×10 <sup>-6</sup>          | 8.51×10 <sup>-6</sup>       | 1.6×10 <sup>-8</sup>                         |                             |
| Au | 6.1×10 <sup>-9</sup>           | 1.4×10 <sup>-8</sup>        | 1×10 <sup>-13</sup>                          | 7.6×10 <sup>-11</sup>       |
| B  | 6.289×10 <sup>-4</sup>         |                             | 4.162×10 <sup>-4</sup>                       |                             |
| Ba | 3.578×10 <sup>-4</sup>         | 8.411×10 <sup>-5</sup>      | 1.09×10 <sup>-7</sup>                        | 1×10 <sup>-9</sup>          |
| Bi | 3.5×10 <sup>-8</sup>           |                             |                                              |                             |
| Br | 4.74×10 <sup>-6</sup>          |                             | 8.385×10 <sup>-4</sup>                       |                             |
| C  | 5.838×10 <sup>-3</sup>         | 0.016                       | 2.248×10 <sup>-3</sup>                       | 0.073                       |
| Ca | 2.0718                         | 0.0315                      | 1.028×10 <sup>-2</sup>                       |                             |
| Cd | 1.266×10 <sup>-6</sup>         | 3.98×10 <sup>-7</sup>       | 6×10 <sup>-10</sup>                          | 2.67×10 <sup>-7</sup>       |
| Cl | 3.621×10 <sup>-3</sup>         |                             | 0.546                                        | 1.628×10 <sup>-3</sup>      |
| Co | 7.535×10 <sup>-4</sup>         | 1.738×10 <sup>-3</sup>      | 2×10 <sup>-11</sup>                          |                             |
| Cr | 6.493×10 <sup>-3</sup>         | 0.058                       | 4×10 <sup>-9</sup>                           |                             |

|    |                         |                        |                        |                        |
|----|-------------------------|------------------------|------------------------|------------------------|
| Cu | 1.3×10 <sup>-3</sup>    | 3.477×10 <sup>-4</sup> | 2.4×10 <sup>-9</sup>   | 3.15×10 <sup>-7</sup>  |
| F  | 1.494×10 <sup>-2</sup>  |                        | 6.843×10 <sup>-5</sup> | 1.178×10 <sup>-3</sup> |
| Fe | 1.376                   | 1.137                  | 5.4×10 <sup>-10</sup>  | 7.341×10 <sup>-6</sup> |
| H  | 0.318                   | 0.803                  | 1.14×10 <sup>-3</sup>  | 0.445                  |
| I  | 4.544×10 <sup>-7</sup>  |                        | 4.57×10 <sup>-7</sup>  |                        |
| K  | 0.041                   | 0.011                  | 1.02×10 <sup>-2</sup>  | 8.184×10 <sup>-6</sup> |
| Mg | 1.885                   | 10.088                 | 0.053                  |                        |
| Mn | 0.025                   | 0.024                  | 3.6×10 <sup>-10</sup>  |                        |
| N  | 5.501×10 <sup>-6</sup>  |                        |                        | 2.318×10 <sup>-2</sup> |
| Na | 0.807                   | 0.049                  | 0.469                  | 2.653×10 <sup>-5</sup> |
| Ni | 4.01×10 <sup>-3</sup>   | 0.038                  | 8.2×10 <sup>-9</sup>   |                        |
| O  | 28.109                  | 27.853                 | 0.1196                 | 0.437                  |
| P  | 0.023                   |                        | 2.002×10 <sup>-6</sup> |                        |
| Pb | 3.297×10 <sup>-6</sup>  | 6.033×10 <sup>-6</sup> | 1.3×10 <sup>-11</sup>  | 2.4×10 <sup>-8</sup>   |
| S  | 0.031                   | 0.0402                 | 0.028                  | 0.04                   |
| Sb | 1.46×10 <sup>-7</sup>   | 1.782×10 <sup>-6</sup> | 1.64×10 <sup>-9</sup>  | 3.3×10 <sup>-10</sup>  |
| Se | 4.132×10 <sup>-6</sup>  | 1.208×10 <sup>-6</sup> | 2×10 <sup>-9</sup>     | 2.91×10 <sup>-7</sup>  |
| Si | 8.425                   | 7.37                   | 9.97×10 <sup>-5</sup>  |                        |
| Sr | 1.6×10 <sup>-3</sup>    | 3.554×10 <sup>-4</sup> | 8.902×10 <sup>-5</sup> |                        |
| Te | 2.4×10 <sup>-8</sup>    |                        |                        |                        |
| Ti | 0.178                   | 0.01                   |                        |                        |
| Tl | 1.16×10 <sup>-7</sup>   |                        | 6.4×10 <sup>-11</sup>  |                        |
| Zn | 1.1398×10 <sup>-3</sup> | 7.834×10 <sup>-4</sup> | 5.4×10 <sup>-9</sup>   | 3.06×10 <sup>-7</sup>  |

\* and \*\*, average for 3480 and four analyses, respectively. Data from PetDB database [39] were downloaded on May 22, 2018. The primary data were recalculated for atomic amounts of elements. The composition of seawater was corrected for pH value of 8.06 (T 25 °C, P 1 bar) by adding 0.00015 m HCl.
